# Supplementary material
Source: Springer Nature journal article supplement (https://www.springermedizin.de/resource/supplementary/13054_2011_499_MOESM5_ESM.pdf/9708618)

metabolic entropy - WEn(s2) and WEn(s3)

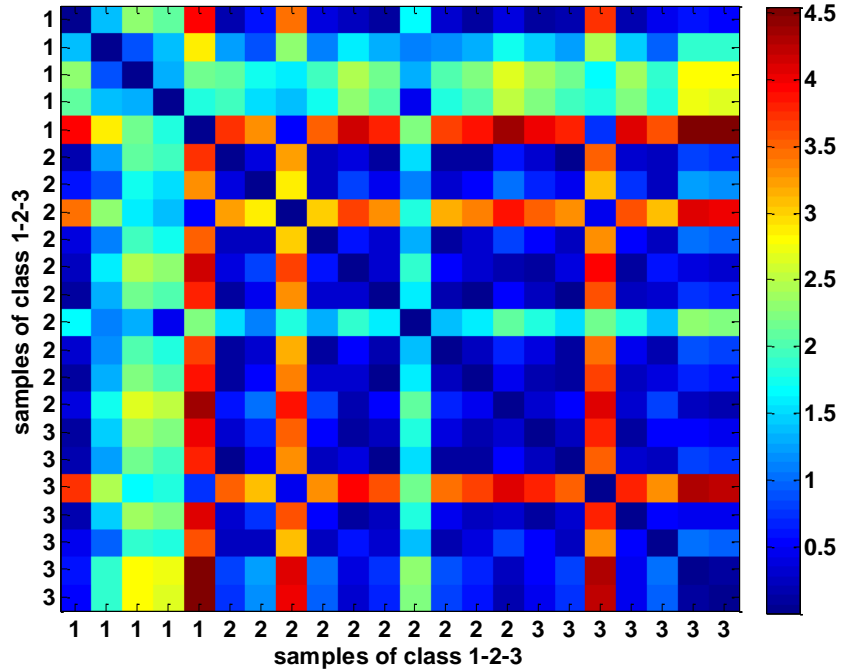

A

ultradian entropy WEn(s5) and WEn(s6)

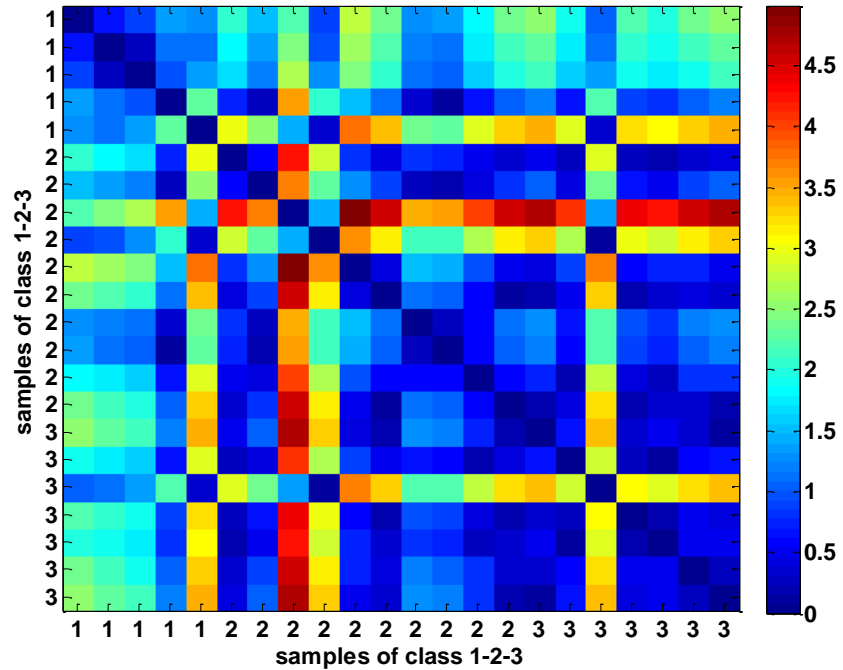

B

Supplement: MOESM5 [file 9708618]
